# Supplementary material
Source: PubMed Central journal article supplement (PMC2809246)

## Supplementary data

**Figure S1.** Comparison of IFV dynamics as analysed by plaque assay or qRT-PCR. HAE cultures were infected with IFV A/PortChalmers/1/73 at 5000 or 10000 pfu/well (plaque assay or qRT-PCR experiment, respectively) and then allowed to incubate through day 9. Apical washes were collected daily and analysed by plaque assay for viral titre, or qRT-PCR for viral M-gene copy number. Values represent means $\pm$ SEM of duplicate or triplicate wells.

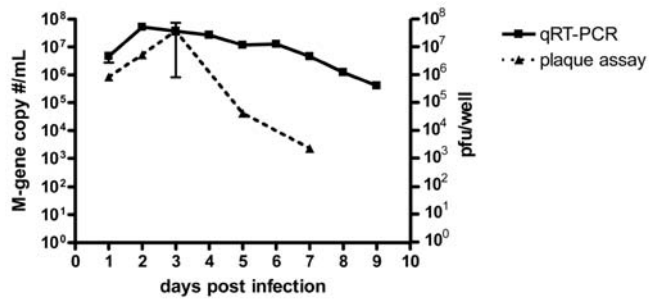

Supplement: dkp421_1.pdf [file dkp421_1.pdf]
